# Supplementary material for: Large pore phenylene-bridged mesoporous organosilica with bicontinuous cubic Ia3d (KIT-6) mesostructure
Source: Royal Society of Chemistry journal article supplement (doi:10.1039/c0jm01518k), 2010-01-01
Supplement: c0jm01518k.pdf [file c0jm01518k.pdf]

## Electronic Supplementary Information (ESI)

### **Large Pore Phenylene-Bridged Mesoporous Organosilica with Bicontinuous Cubic $Ia\bar{3}d$ (KIT-6) Mesostructure**

Wanping Guo,<sup>a</sup> Freddy Kleitz,<sup>c</sup> Kanghee Cho<sup>ab</sup> and Ryong Ryoo<sup>\*ab</sup>

<sup>a</sup>Center for Functional Nanomaterials, Department of Chemistry, KAIST, Daejeon 305-701, Korea

<sup>b</sup>Graduate School of Nanoscience and Technology (WCU), KAIST, Daejeon 305-701, Korea

<sup>c</sup>Canada Research Chair on Functional nanostructured materials, Dept. of Chemistry, Université Laval, Québec, G1V 0A6, QC, Canada

\*corresponding author: [rryoo@kaist.ac.kr](mailto:rryoo@kaist.ac.kr)

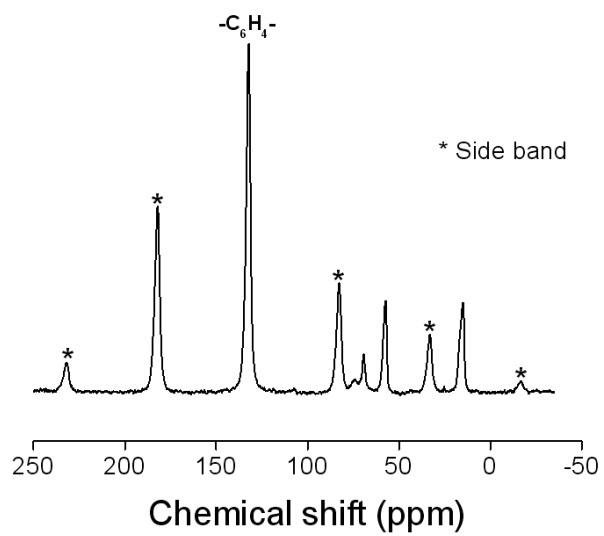

**Fig. S1**  $^{13}\text{C}$  CP NMR spectrum of PMO-KIT-6-(1)-100-E which was ethanol-washed sample without further thermal treatment.

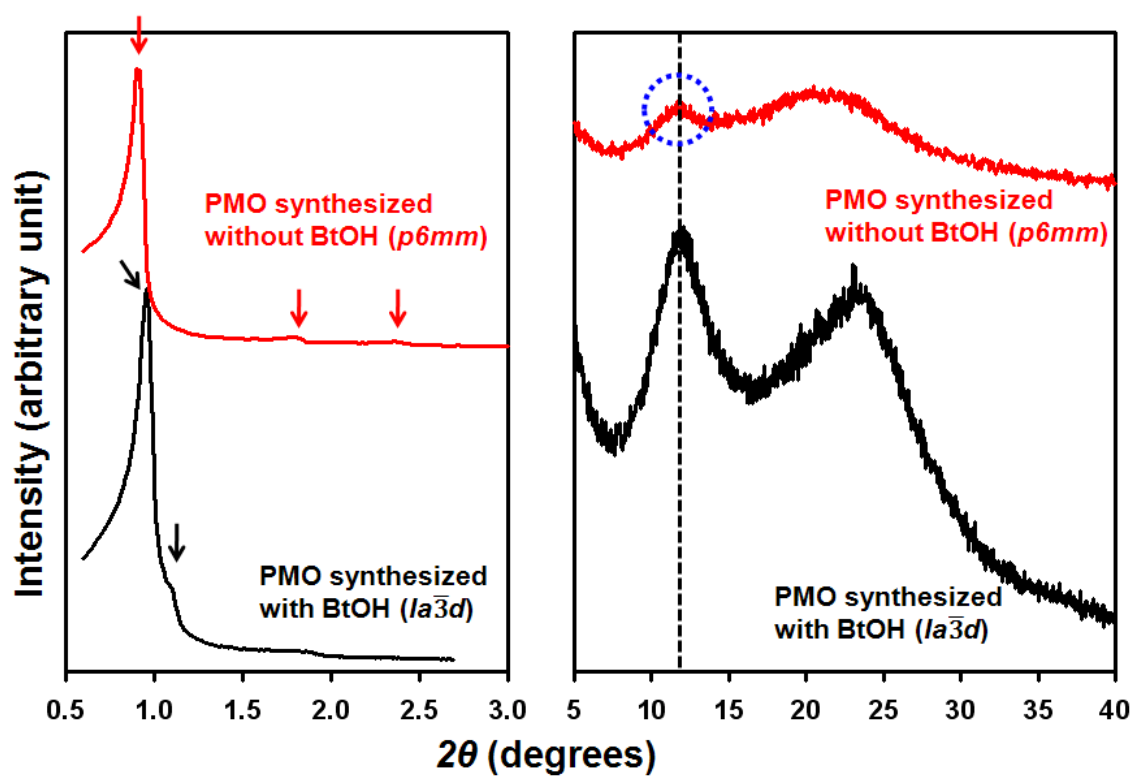

**Fig. S2** Low angle (left) and wide-angle (right) powder XRD patterns for a surfactant-free cubic  $Ia\bar{3}d$  phenylene-bridged PMO material and the respective 2-D hexagonal phenylene-bridged PMO material which was prepared under the same conditions except for the absence of butanol.
